# Supplementary material
Source: PubMed Central journal article supplement (PMC3240669)
Supplement: NIHMS68887-supplement-Supp__File.pdf [file NIHMS68887-supplement-Supp__File.pdf]

## Supplementary Figures, Tables, and Text

### **TRAMP-mediated RNA surveillance prevents spurious entry of RNAs into the *S. pombe* siRNA pathway**

Marc Bühler<sup>1,3,4</sup>, Noah Spies<sup>2,4</sup>, David P. Bartel<sup>2</sup> and Danesh Moazed<sup>1</sup>

<sup>1</sup> Department of Cell Biology, 240 Longwood Avenue, Harvard Medical School, Boston, MA 02115 USA

<sup>2</sup> Howard Hughes Medical Institute and Department of Biology, Massachusetts Institute of Technology, and Whitehead Institute for Biomedical Research, 9 Cambridge Center, Cambridge, MA 02142 USA

<sup>3</sup> present address: Friedrich Miescher Institute for Biomedical Research, Maulbeerstrasse 66, 4058 Basel, Switzerland

<sup>4</sup> these authors contributed equally to this work

Biased loading

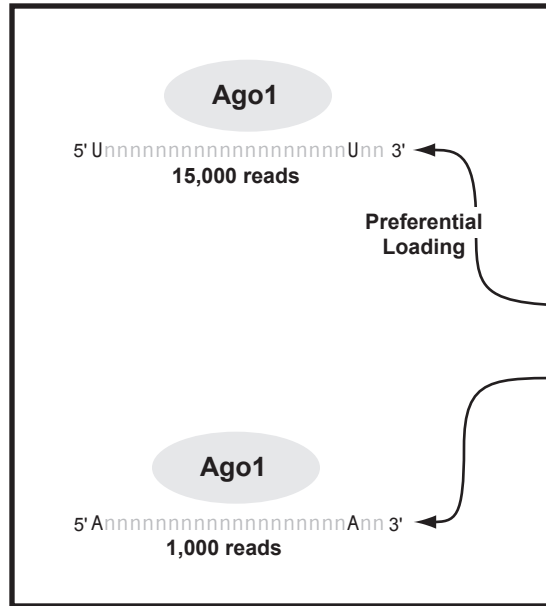

16,000 centromeric loci

dsRNA

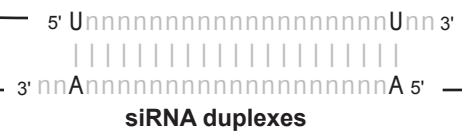

Unbiased loading with differential post-loading degradation

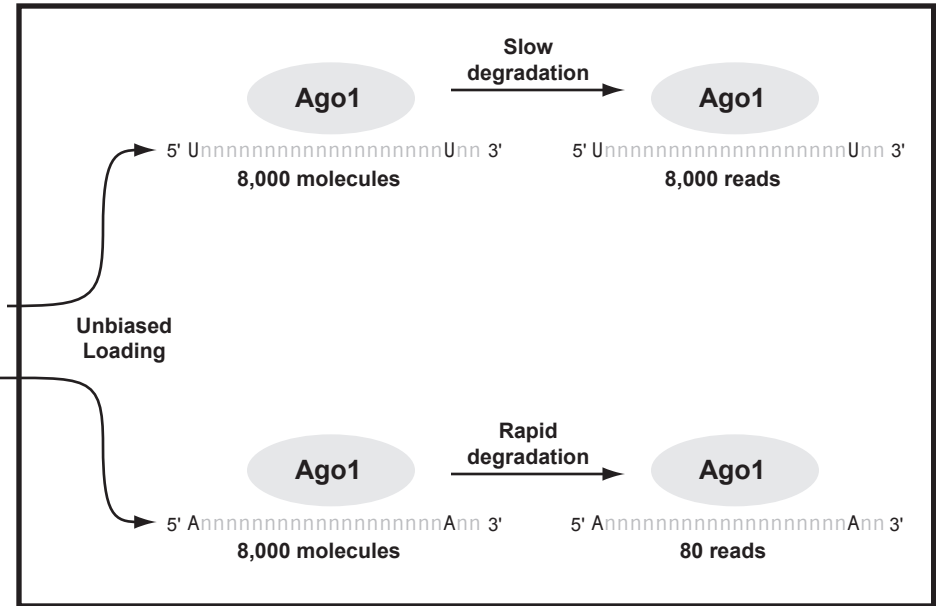

| dinuc at 23-24 | 22mer preferred | 23mer preferred | Ratio |
|----------------|-----------------|-----------------|-------|
| AA             | 856             | 540             | 1.585 |
| AC             | 392             | 278             | 1.410 |
| AG             | 316             | 348             | 0.908 |
| AT             | 718             | 666             | 1.078 |
| CA             | 604             | 410             | 1.473 |
| CC             | 177             | 178             | 0.994 |
| CG             | 184             | 151             | 1.219 |
| CT             | 367             | 257             | 1.428 |
| GA             | 253             | 464             | 0.545 |
| GC             | 141             | 344             | 0.410 |
| GG             | 64              | 293             | 0.218 |
| GT             | 214             | 525             | 0.408 |
| TA             | 515             | 234             | 2.201 |
| TC             | 475             | 325             | 1.462 |
| TG             | 542             | 334             | 1.623 |
| TT             | 805             | 664             | 1.212 |

Supplementary Table 1. There is an up to 2-fold preference for 22nt species over 23nt species when the base at position 23 is a U. For each locus where both the 22nt and 23nt sequences were present with identical 5' ends, the species with the greater number of normalized reads was indicated as preferred, and these counts were recorded according to the dinucleotide at position 22–23 from the common 5' end.

| 3 terminal nucs (2 nearest neighbors) |       |       |       |
|---------------------------------------|-------|-------|-------|
| Sample:                               | cid14 | cid14 | cid14 |
| Size:                                 | 22    | 23    | 24    |
| Total sames:                          | 718   | 581   | 212   |
| Total opposites:                      | 781   | 560   | 133   |
| Chi-sq p-value:                       | 0.104 | 0.534 | 0.000 |
|                                       |       |       |       |
|                                       |       |       |       |
|                                       |       |       |       |
|                                       |       |       |       |
| Sample:                               | wt    | wt    | wt    |
| Size:                                 | 22    | 23    | 24    |
| Total sames:                          | 1638  | 1611  | 714   |
| Total opposites:                      | 1772  | 1599  | 751   |
| Chi-sq p-value:                       | 0.022 | 0.832 | 0.334 |

Supplementary Table 2. No evidence for strand preference based on terminal stability. Terminal three base pairs (2 nearest neighbors) were analyzed using a nearest neighbors algorithm and the 5' end with the highest stability was counted as same if it had more reads than the inferred duplex, or opposite if the opposite strand had more reads. Duplexes with identical stability at both ends were ignored. Because of the strong 5' U bias, only those duplexes with the same 5' nucleotide on both strands were counted.

Supplementary Table 3. Genes with highest number of antisense reads (sorted by number of reads antisense to gene in wild-type). The number of reads and sequences is counting only those reads that map uniquely to the genome, with the exception of those mapping to tlh1 and tlh2. Most gene-matching reads either map to several genomic loci (not shown here) or map to the sense strand of the gene and are presumably degradation products.

| Wild-type |       |        |       | cid14     |      |       |      | Systematic Name | Gene product                                               |
|-----------|-------|--------|-------|-----------|------|-------|------|-----------------|------------------------------------------------------------|
| Antisense |       | Sense  |       | Antisense |      | Sense |      |                 |                                                            |
| Reads     | Seqs  | Reads  | Seqs  | Reads     | Seqs | Reads | Seqs |                 |                                                            |
| 3,124*    | 2,172 | 1,196* | 1,133 | 413*      | 597  | 122*  | 213  | SPBCPT2R1.08c   | RecQ type DNA helicase Tlh1                                |
| 3,123*    | 2,171 | 1,228* | 1,138 | 412*      | 596  | 121*  | 212  | SPAC212.11      | RecQ type DNA helicase                                     |
| 54        | 46    | 53     | 36    | 16        | 13   | 67    | 60   | SPCC13B11.01    | alcohol dehydrogenase Adh1                                 |
| 43        | 34    | 206    | 108   | 4         | 4    | 34    | 28   | SPCC330.05c     | orotidine 5'-phosphate decarboxylase Ura4                  |
| 33        | 23    | 0      | 0     | 38        | 29   | 0     | 0    | SPAC27E2.13     | dubious                                                    |
| 8         | 6     | 0      | 0     | 0         | 0    | 0     | 0    | SPBC3D6.16      | sequence orphan                                            |
| 7         | 7     | 0      | 0     | 4         | 4    | 5     | 5    | SPBC317.01      | MADS-box transcription factor Pvg4                         |
| 7         | 5     | 0      | 0     | 5         | 2    | 0     | 0    | SPBC725.06c     | serine/threonine protein kinase Ppk31                      |
| 6         | 4     | 0      | 0     | 2         | 1    | 0     | 0    | SPAC212.06c     | pseudogene/pseudo                                          |
| 6         | 6     | 0      | 0     | 2         | 2    | 0     | 0    | SPAC22F3.04     | AMP binding enzyme                                         |
| 4         | 4     | 26     | 22    | 0         | 0    | 25    | 24   | SPAPB8E5.03     | malic acid transport protein Mae1                          |
| 4         | 4     | 0      | 0     | 7         | 5    | 0     | 0    | SPCC285.14      | TRAPP complex subunit Trs130                               |
| 4         | 4     | 0      | 0     | 4         | 3    | 0     | 0    | SPBC1861.06c    | S. pombe specific UPF0300 family protein 4                 |
| 4         | 4     | 0      | 0     | 1         | 1    | 0     | 0    | SPAC25H1.09     | alpha-amylase homolog Mde5                                 |
| 4         | 3     | 1      | 1     | 6         | 4    | 2     | 2    | SPBC776.10c     | Golgi transport complex peripheral subunit                 |
| 4         | 3     | 2      | 1     | 1         | 1    | 1     | 1    | SPBC1215.02c    | NatB N-acetyltransferase complex non catalyticsubunit Arm1 |
| 4         | 1     | 0      | 0     | 0         | 0    | 1     | 1    | SPAC25H1.05     | sequence orphan                                            |
| 4         | 1     | 0      | 0     | 0         | 0    | 1     | 1    | SPCC16C4.02c    | DUF1941 family protein                                     |
| 3         | 3     | 0      | 0     | 5         | 5    | 0     | 0    | SPBC19G7.01c    | MutS protein homolog 2                                     |
| 3         | 3     | 1      | 1     | 3         | 3    | 4     | 3    | SPAC22F8.11     | phosphoinositide phospholipase C Plc1                      |
| 3         | 3     | 1      | 1     | 1         | 1    | 6     | 5    | SPBC947.02      | AP-1 adaptor complex subunit Apl2                          |
| 3         | 3     | 5      | 4     | 1         | 1    | 9     | 7    | SPBC418.01c     | imidazoleglycerol-phosphate synthase                       |
| 3         | 3     | 3      | 3     | 0         | 0    | 2     | 2    | SPAC10F6.02c    | ATP-dependent RNA helicase Prp22                           |
| 3         | 3     | 0      | 0     | 0         | 0    | 1     | 1    | SPAC11H11.04    | pheromone p-factor receptor                                |
| 3         | 3     | 0      | 0     | 0         | 0    | 2     | 2    | SPAC167.03c     | U4/U6 x U5 tri-snRNP complex subunit Snu66                 |
| 3         | 3     | 0      | 0     | 0         | 0    | 0     | 0    | SPAC3H8.09c     | poly(A) binding protein Nab3                               |
| 3         | 3     | 0      | 0     | 0         | 0    | 0     | 0    | SPAC6C3.07      | sequence orphan                                            |
| 3         | 3     | 0      | 0     | 0         | 0    | 0     | 0    | SPAC4F8.08      | sequence orphan                                            |
| 3         | 3     | 0      | 0     | 0         | 0    | 0     | 0    | SPBC3D6.10      | AP-endonuclease Apn2                                       |
| 3         | 2     | 5      | 5     | 6         | 5    | 2     | 2    | SPAC57A7.05     | conserved protein (fungal and plant)                       |
| 3         | 2     | 0      | 0     | 1         | 1    | 0     | 0    | SPCC126.01c     | conserved fungal protein                                   |
| 3         | 2     | 0      | 0     | 1         | 1    | 0     | 0    | SPBC36B7.07     | SNARE Tgl1                                                 |
| 3         | 2     | 3      | 3     | 0         | 0    | 2     | 1    | SPBC1539.07c    | glutathione-dependent formaldehyde dehydrogenase           |
| 3         | 1     | 7      | 6     | 6         | 3    | 4     | 4    | SPAC23C11.06c   | hydrolase                                                  |
| 3         | 1     | 0      | 0     | 1         | 1    | 0     | 0    | SPBC32H8.06     | TPR repeat protein, meiotically spliced                    |
| 3         | 1     | 2      | 2     | 1         | 1    | 0     | 0    | SPCC126.02c     | Ku domain protein Pku70                                    |
| 3         | 1     | 1      | 1     | 0         | 0    | 2     | 2    | SPBC21.05c      | Ras guanyl-nucleotide exchange factor Ral2                 |
| 3         | 1     | 2      | 2     | 0         | 0    | 0     | 0    | SPBC776.06c     | spindle pole body interacting protein                      |
| 3         | 1     | 0      | 0     | 0         | 0    | 2     | 1    | SPAC5H10.09c    | 3-methyl-2-oxobutanoatehydroxymethyltransferase            |
| 3         | 1     | 0      | 0     | 0         | 0    | 1     | 1    | SPAC3C7.03c     | RecA family ATPase Rhp55                                   |
| 3         | 1     | 1      | 1     | 0         | 0    | 0     | 0    | SPBP8B7.28c     | sequence orphan                                            |

\* Nearly all of these reads map to the genome exactly twice: once to tlh1 and once to tlh2.

**Table S4.** List of strains used in this study.

| Strain  | Genotype                                                                                                      |
|---------|---------------------------------------------------------------------------------------------------------------|
| SPY137  | SPY137 <i>h<sup>+</sup> leu1-32 ade6-M210 ura4DS/E otr1R(SphI)::ura4<sup>+</sup> oriA</i>                     |
| SPY1220 | <i>h<sup>+</sup> leu1-32 ade6-M210 ura4DS/E otr1R(SphI)::ura4<sup>+</sup> oriA cid14Δ::nat<sup>R</sup></i>    |
| SPY815  | <i>h<sup>+</sup> leu1-32 ade6-M210 ura4DS/E otr1R(SphI)::ura4<sup>+</sup> oriA clr4Δ::kan<sup>R</sup></i>     |
| SPY1220 | <i>h<sup>+</sup> leu1-32 ade6-M210 ura4DS/E otr1R(SphI)::ura4<sup>+</sup> oriA cid14Δ::nat<sup>R</sup></i>    |
| SPY28   | <i>h<sup>+</sup> leu1-32 ade6-M216 ura4-D18 imr1R(NcoI)::ura4<sup>+</sup> oril</i>                            |
| SPY86   | <i>h<sup>+</sup> leu1-32 ade6-M216 ura4-D18 imr1R(NcoI)::ura4<sup>+</sup> oril dcr1Δ::TAP-kan<sup>R</sup></i> |
| SPY87   | <i>h<sup>+</sup> leu1-32 ade6-M216 ura4-D18 imr1R(NcoI)::ura4<sup>+</sup> oril rdp1Δ::TAP-kan<sup>R</sup></i> |
| SPY399  | <i>h<sup>+</sup> leu1-32 ade6-M216 ura4-D18 imr1R(NcoI)::ura4<sup>+</sup> oril clr4Δ::nat<sup>R</sup></i>     |
| SPY787  | <i>h<sup>+</sup> leu1-32 ade6-M216 ura4-D18 imr1R(NcoI)::ura4<sup>+</sup> oril cid14Δ::nat<sup>R</sup></i>    |
| SPY139  | <i>h90 leu1-32 ade6-M210 ura4DS/E mat3M::ura4<sup>+</sup></i>                                                 |
| SPY1313 | <i>h90 leu1-32 ade6-M210 ura4DS/E mat3M::ura4<sup>+</sup> rrp6Δ:: nat<sup>R</sup></i>                         |
| SPY1408 | <i>h90 leu1-32 ade6-M210 ura4DS/E mat3M::ura4<sup>+</sup> mtr4-1(mtr4<sup>+</sup>::TAP-nat<sup>R</sup>)</i>   |
| SPY1284 | <i>h<sup>-</sup> leu1Δ ura4Δ dis3-54</i>                                                                      |
| SPB45   | <i>h? cid14Δ:: nat<sup>R</sup> rdp1Δ:: kan<sup>R</sup> ura4+::5BoxB/HPH leu1-32</i>                           |
| SPB46   | <i>h? cid14Δ:: nat<sup>R</sup> dcr1Δ:: kan<sup>R</sup> ura4+::5BoxB/HPH leu1-32</i>                           |

**Table S5.** List of oligonucleotides used in this study.

| Name  | Sequence                                                 |
|-------|----------------------------------------------------------|
| mb86  | 5'-AACCCCTCAGCTTTGGGTCTT-3'                              |
| mb87  | 5'-TTTGCATACGATCGGCAATA-3'                               |
| mb90  | 5'-CAACCCTCAGCTTTGGGTCTTG-3'                             |
| mb91  | 5'-TCCTTTTGCATACGATCGGCAATAC-3'                          |
| mb510 | 5'-AAAATGTTTTCTATGCTACTTTAACAAATTCGCACAAAG-3'            |
| mb511 | 5'-AAAGTGCACGCTCTAATTTTAAATTTAACAGTCTATAAAGTTTAG-3'      |
| mb512 | 5'-CCTAGCCACTGGACCATGACGGA-3'                            |
| mb521 | 5'-AGGCCAGCTACGCTACTC-3'                                 |
| mb522 | 5'-CGACTTACTATTAAGCATTGATTGCAAATTACATTTTG-3'             |
| mb523 | 5'-AAATAGTGTCTGAACAATAATCATAAAACTTTCTATGCTAAC-3'         |
| mb524 | 5'-CATAGTATCTTAGAAAAATGTGAAAAGTGTTAGTTTACTATTCTC-3'      |
| mb525 | 5'-TTAAGCATAATAAAAAAGATTCTTTGAAAGTGGAAGAAATCATG-3'       |
| mb526 | 5'-CACTAAAAATTTGAGAAAATAATAAACGTGTCAAGCTCTTTC-3'         |
| mb527 | 5'-TTAAACGTAACCGATACATAATTTAGGCCAAAAATTGTTG-3'           |
| mb528 | 5'-GTTTCATCTAAAAGCTTCAAAAAATATTAATATTGAGTCTAAAATCAAGT-3' |
| rsi1  | 5'-CAAGTTTGTCCAACCTTCTCGGCA-3'                           |
| rsi2  | 5'-AGCCAATCCAGAGGCCTCACTAA-3'                            |
| rsi3  | 5'-TAATGATCCTTCCGCAGGTTACC-3'                            |
| rsi4  | 5'-AGGTAGTGGTATTTACCCGGCGTA-3'                           |
| rsi5  | 5'-AAGCCAATCCAGAGGCCTCACTAA-3'                           |
| rsi6  | 5'-GGCGAGAAAAGACATCGGTCCAC-3'                            |
| rsi7  | 5'-ATTTTTTGCCTACCAACAAGA-3'                              |
| rsi8  | 5'-GACCAGTAAACACGCCTTGCG-3'                              |
| rsi9  | 5'-CCAAGTTTGTCCAACCTTCTCGGCA-3'                          |
| rsi10 | 5'-ACCAGTAAACACGCCTTGCG-3'                               |
| rsi11 | 5'-GGTATTGTAAGCAGTAGAGTA-3'                              |
| rsi12 | 5'-CAATGGTAATTCAACTTAGTA-3'                              |
| rsi13 | 5'-CAGAATTCGGTAAGCGTTGGA-3'                              |
| rsi14 | 5'-GCAATGGTAATTCAACTTAGTA-3'                             |
| rsi15 | 5'-TTGGACAAACTTGGTCATTTA-3'                              |
| rsi16 | 5'-GTATTGTAAGCAGTAGAGTA-3'                               |
| rsi17 | 5'-ACTTGTTCCCTACTCTCCTGTA-3'                             |
| rsi18 | 5'-TTCCTACTCTCCTGTATCGTA-3'                              |
| DM566 | 5'-TTATTGATGGCGAAGCTAGATCCG-3'                           |
| DM567 | 5'-AACTCCATAACCACCACCATGCTC-3'                           |

## Supplementary Text

### Strand selection

Duplexes of miRNAs and synthetic siRNAs tend to bind the loading machinery asymmetrically, such that the strand least stably paired at its 5' end is preferentially loaded as the guide strand within the silencing complex<sup>34</sup>. We examined whether the same was true for heterochromatic siRNAs, focusing on the inferred duplexes that match sequenced 23mers deriving from the centromeric *dg/dh* repeats. To ensure that the identity of the 5' nucleotides did not influence the result, we considered only the 3210 duplexes in which the two 5' nucleotides were identical (**Supplementary Table 2**).

### Ago1 preferentially loads siRNAs with 5'-uracil

Since preferential siRNA processing and pairing asymmetry contribute little to the enrichment for species with a 5'-U, this strong bias must arise either from preferential loading of siRNAs with a 5'-U into Ago1, or preferential stability of species with 5'-U already in Ago1. To discern between these two possibilities, we looked at centromeric reads with 5'-U whose inferred duplex partner also has a 5'-U (U...A.. species, **Table 1**). There are approximately 8,000 centromeric loci that could form such duplexes. We compared reads from these duplexes to 5'-U reads whose inferred duplex partner has a 5' A (U...U.., **Table 1**). Because U...U.. can occur independently on either genomic strand, there are approximately twice as many such loci, and indeed, we counted approximately 16,000 centromeric occurrences of the 23mer sequence U...U.. .

For each U...A.. duplex, either the + or – strand can be loaded into Ago1, presumably with identical affinity, given the lack of pairing asymmetry and that the opposite strand also has a 5'-U. The number of reads from these duplexes would be proportional to the depth of sequencing and the number of genomic loci, assuming each locus produces dsRNA at approximately the same rate. We



observed an average of slightly less than one read per centromeric locus (7,654 reads).

Suppose Ago1 loaded siRNAs with equal efficiency, regardless of 5' nucleotide, but that loaded siRNAs beginning with G, C and A were degraded much more rapidly than those with a 5' U (**Supplementary Figure 1**, right box). In this case, we would expect half of all U...U.. duplexes to load the U...U.. strand, and half to load the paired A...A.. strand instead. Once loaded, the A...A.. species would degrade quickly, resulting in the substantial 5' nucleotide bias in our sequencing data. Given the approximately 1 read to 1 genomic locus ratio from above, and 16,000 loci, we would expect approximately 8,000 U...U.. reads. However, we observed 9,245 reads, significantly more than expected by this model.

We turn instead to a model whereby Ago1 loads the strand with 5' U preferentially compared to duplex partners with 5' G, C or A (**Supplementary Figure 1**, left box). Under this model, we expect some majority of reads from U...U../A...A.. duplexes to be loaded from the U...U.. strand. At a rate of 1 read to 1 genomic locus, this would mean observing more than 8,000 reads, which is consistent with the 9,245 reads observed. The number of U...U.. reads plus the number of A...A.. reads is not twice the number of U...A.. reads, despite the fact that there are twice as many centromeric loci. We attribute this observation to a limited number of encounters of the U...U../A...A.. duplex with the Ago1-loading machinery because some duplex molecules that are released after nonproductive encounters in the suboptimal orientation are presumably degraded before they have another opportunity to encounter the loading machinery.

Because the centromeric regions are particularly AT-rich, the number of potential duplexes with 5'-U and an inferred duplex species with a 5'-G or 5'-C is much lower than that with an inferred duplex species with a 5'-A. There are approximately 8,000 U...C.. loci, and a similar number of U...G.. loci, in the centromeric regions. The model in which siRNAs are loaded with equal efficiency and then differential post-loading degradation explains the sequencing bias predicted approximately 4,000 U...C.. reads and approximately 4,000 U...G..

reads. However, the observed number of reads from U...C.. species (7,423 reads) and U...G.. species (7,835 reads) were nearly 1 per locus, consistent with the second model, and further supporting preferential loading as a major factor in the 5'-U bias.
